# Supplementary material
Source: PubMed Central journal article supplement (PMC5568448)

# Supplementary Note 1 – Raw images of Western blots and an agarose gel

Fig. 2f

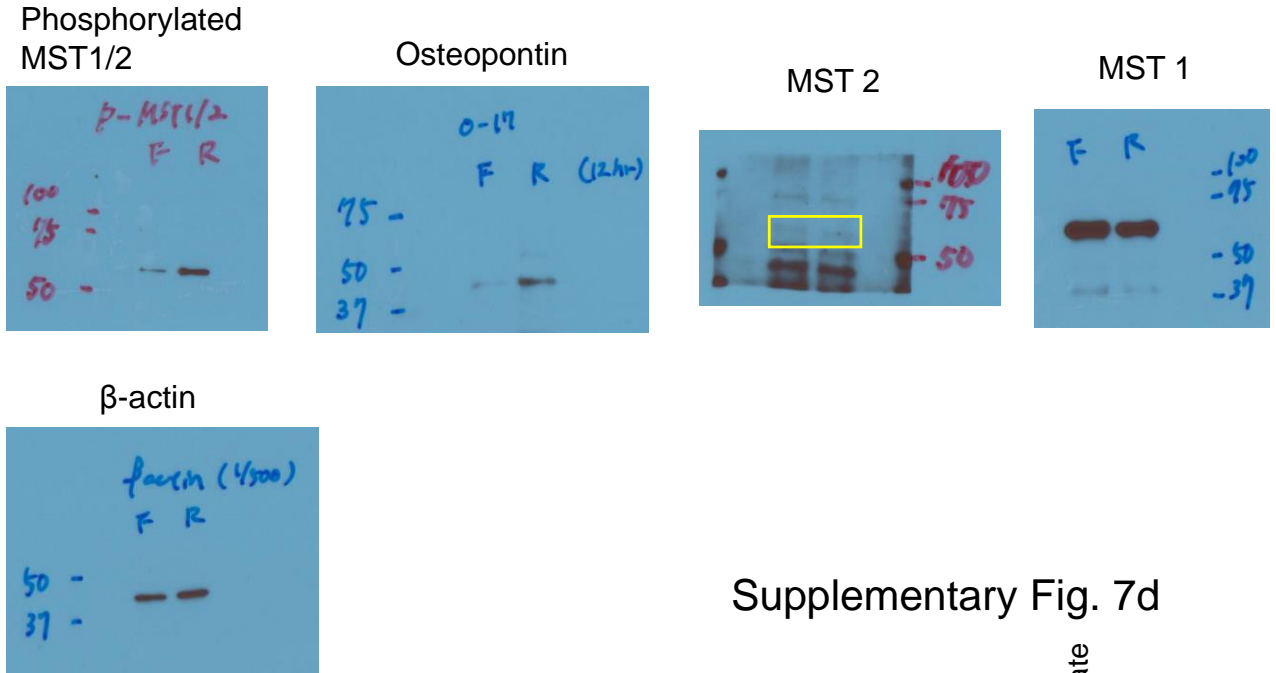

Fig. 4h

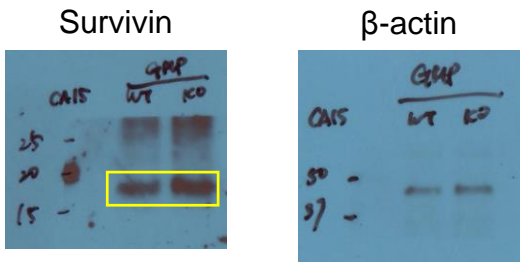

Supplementary Fig. 7d

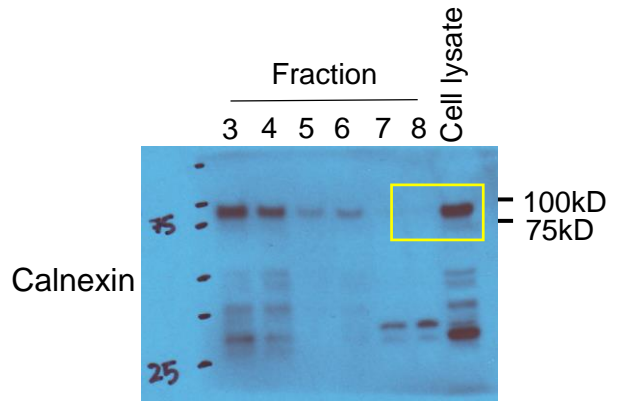

Supplementary Fig. 7c

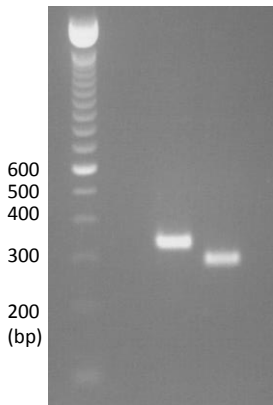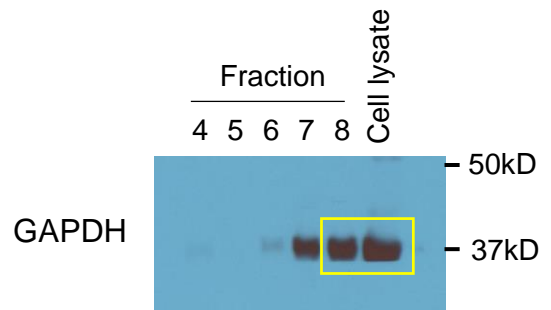

Supplement: NIHMS884854-supplement-2.pdf [file NIHMS884854-supplement-2.pdf]
