# Supplementary material
Source: PubMed Central journal article supplement (PMC5568448)
Supplement: NIHMS884854-supplement-3.pdf [file NIHMS884854-supplement-3.pdf]

|                                  | WT         | <i>Spp1<sup>-/-</sup></i> |
|----------------------------------|------------|---------------------------|
| Number of reads                  | 37,270,633 | 28,982,601                |
| Number of cells                  | 3,294      | 4,574                     |
| Mean reads cells <sup>-1</sup>   | 11,314     | 6,336                     |
| Median genes cells <sup>-1</sup> | 894        | 972                       |
| Median UMI cells <sup>-1</sup>   | 1,902      | 1,939                     |

**Supplementary Table 1.** Cell counts and sequencing totals, including unique molecular identifiers which allow for within cell, gene specific counts of RNA molecules for single cell sequencing.

| <b>Gene</b>     | <b>Primer</b> | <b>Sequences</b>          |
|-----------------|---------------|---------------------------|
| <i>Opn</i>      | Forward       | GCCTGTTTGGCATTGCCTCCTC    |
|                 | Reverse       | CACAGCATTCTGTGGCGCAAGG    |
| <i>Tnfa</i>     | Forward       | CATCTTCTCAAAATTCGAGTGACAA |
|                 | Reverse       | TGGGAGTAGACAAGGTACAACCC   |
| <i>Ikaros</i>   | Forward       | CACTACCTCTGGAGCACAGC      |
|                 | Reverse       | ATAGGGCATGTCTGACAGGCA     |
| <i>Spi1</i>     | Forward       | CGGATGTGCTTCCCTTATCAAAC   |
|                 | Reverse       | TGACTTTCTTCACCTCGCCTGTC   |
| <i>Pbx1</i>     | Forward       | AGGACATCGGGGACATTTTAC     |
|                 | Reverse       | CATTAACAAGGCAGGCTTCA      |
| <i>Gata2</i>    | Forward       | CAAGAAAGGGGCTGAATGTTTTCG  |
|                 | Reverse       | GTGTCCCACAGGTGCCATG       |
| <i>Notch1</i>   | Forward       | CCCTTGCTCTGCCTAACGC       |
|                 | Reverse       | GGAGTCCTGGCATCGTTGG       |
| <i>Notch2</i>   | Forward       | ATGTGGACGAGTGTCTGTTGC     |
|                 | Reverse       | GGAAGCATAGGCACAGTCATC     |
| <i>Scl</i>      | Forward       | TCCCATATGAGATGGAGATTTTC   |
|                 | Reverse       | ATTGATGTACTTCATGGCAAGG    |
| <i>Hoxb3</i>    | Forward       | GCTCTTCGGAGGCTACTCCT      |
|                 | Reverse       | GACTGCAGAGAACACGCTGA      |
| <i>Hoxb4</i>    | Forward       | CCTGGATGCGCAAAGTTCA       |
|                 | Reverse       | CTTGGGCTCCCCGCC           |
| <i>Flt3</i>     | Forward       | CATCCAAGACAACATCTCCT      |
|                 | Reverse       | CCCTGAAGTCAACGTAGAAG      |
| <i>Birc5</i>    | Forward       | GAGGCTGGCTTCATCCACTG      |
|                 | Reverse       | ATGCTCCTCTATCGGGTTGTC     |
| <i>Actb</i>     | Forward       | TGTTACCAACTGGGACGACA      |
|                 | Reverse       | CTGGGTCATCTTTTCACGGT      |
| <i>Hsp90ab1</i> | Forward       | CCACCCTGCTCTGTACTACT      |
|                 | Reverse       | CCTGAAAGGCAAAGGTCTCC      |

**SUPPLEMENTARY TABLE 2.** List of primers for qPCR.
